# Supplementary material for: Fetuin-A Deficiency but Not Pentraxin 3, FGF-21, or Irisin, Predisposes to More Serious COVID-19 Course
Source: MDPI journal article supplement (doi:10.3390/biom11101422), 2021-09-28
Supplement: s1 [file s1]

**Supplementary Table 1.** Comparison of biochemical parameters analyzed in the blood of male and female COVID-19 patients.

| Parameters                | Females<br>(n = 43)    | Males<br>(n = 27)      | P    |
|---------------------------|------------------------|------------------------|------|
| FGF-21 [pg/ml]            | 279.8 (100.6-536.9)    | 249.1 (83.0-410.6)     | 0.26 |
| PTX3 [pg/ml]              | 2304.6 (1869.8-3212.1) | 2740.1 (2194.8-3157.0) | 0.21 |
| Fetuin-A [µg/ml]          | 243.5 (193.9-275.7)    | 246.6 (217.4-270.8)    | 0.67 |
| Irisin [ng/ml]            | 5.61 (4.47-6.51)       | 4.12 (3.73-6.74)       | 0.15 |
| WBC [10 <sup>3</sup> /µl] | 5.66 (4.42-6.68)       | 5.99 (4.90-6.21)       | 0.95 |
| HGB [mg/dl]               | 12.7 (12.2-13.2)       | 12.8 (12.5-14.0)       | 0.28 |
| PLT [10 <sup>3</sup> /µl] | 250.5 (205.0-329.0)    | 238.5 (186.0-336.5)    | 0.70 |
| CRP [mg/l]                | 3.90 (1.66-10.7)       | 6.24 (2.98-23.9)       | 0.10 |
| IL-6 [pg/ml]              | 2.51 (1.50-6.16)       | 3.53 (1.50-6.62)       | 0.98 |
| Ferritin [µg/l]           | 176.0 (109.5-351.0)    | 307.0 (179.0-665.5)    | 0.04 |
| Iron [µmol/l]             | 17.4 (11.7-22.5)       | 14.3 (10.1-19.7)       | 0.29 |
| ALT [IU/l]                | 42.5 (26.0-61.5)       | 25.0 (12.5-41.5)       | 0.01 |
| AST [IU/l]                | 30.0 (18.5-45.5)       | 23.0 (17.2-29.5)       | 0.16 |
| GGT [IU/l]                | 34.0 (20.5-68.5)       | 35.0 (23.7-94.5)       | 0.51 |
| ALP [IU/l]                | 64.0 (54.0-75.7)       | 61.0 (53.5-90.0)       | 0.65 |
| Bilirubin [µmol/l]        | 6.87 (4.70-8.56)       | 5.97 (4.49-6.67)       | 0.07 |
| INR                       | 0.95 (0.92-0.98)       | 1.01 (0.96-1.07)       | 0.06 |
| Albumin [g/l]             | 40.0 (36.0-43.0)       | 40.0 (34.0-43.0)       | 0.44 |
| HOMA-IR                   | 2.09 (1.76-2.68)       | 2.52 (1.93-4.40)       | 0.13 |
| Saturation %              | 97 (96-98)             | 96 (92.75-98)          | 0.20 |

Abbreviations: ALT - alanine transaminase, AST - aspartate transaminase, BMI - body mass index, CRP - C-reactive protein, GGT - gamma-glutamyl-transferase, HCT - hematocrit, HDL - high-density lipoprotein, HGB - hemoglobin, INR - international normalized ratio, LDL - low-density lipoprotein, WBC - white blood cells, PLT - platelet count, RBC - red blood cells.

**Supplementary Table 2.** Comparison of biochemical parameters analyzed in the blood of COVID-19 patients presenting different infection symptoms.

| Parameters                | Patients with cough and dyspnea (n = 41) | Patients with isolated cough (n = 20) | p     |
|---------------------------|------------------------------------------|---------------------------------------|-------|
| FGF-21 [pg/ml]            | 278.8 (156.1-414.7)                      | 192.9 (91.5-594.9)                    | 0.69  |
| PTX3 [pg/ml]              | 2557.6 (2101.3-3045.9)                   | 2179.4 (1866.4-2812.7)                | 0.24  |
| Fetuin-A [μg/ml]          | 231.2 (211.1-262.9)                      | 238.8 (187.4-260.2)                   | 0.71  |
| Irisin [ng/ml]            | 5.80 (3.93-7.97)                         | 5.61 (4.33-6.41)                      | 0.34  |
| WBC [10 <sup>3</sup> /μl] | 5.99 (5.11-6.66)                         | 5.93 (4.86-6.97)                      | 1.00  |
| HGB [mg/dl]               | 13.1 (12.6-13.9)                         | 12.5 (12.0-13.0)                      | 0.03  |
| PLT [10 <sup>3</sup> /μl] | 279.0 (192.5-330.5)                      | 284.5 (206.5-368.0)                   | 0.67  |
| CRP [mg/l]                | 5.88 (2.43-11.9)                         | 5.06 (1.86-14.6)                      | 0.88  |
| IL-6 [pg/ml]              | 3.04 (1.50-11.5)                         | 2.03 (1.50-15.1)                      | 1.00  |
| Ferritin [μg/l]           | 285.0 (89.3-526.0)                       | 202.0 (141.0-525.0)                   | 0.95  |
| Iron [μmol/l]             | 15.9 (10.1-21.7)                         | 17.4 (6.77-23.3)                      | 0.57  |
| ALT [IU/l]                | 25.0 (15.0-37.0)                         | 45.0 (32.5-75.5)                      | 0.003 |
| AST [IU/l]                | 23.0 (17.2-36.0)                         | 30.0 (20.2-56.2)                      | 0.18  |
| GGT [IU/l]                | 62.0 (24.0-73.0)                         | 33.5 (18.0-59.0)                      | 0.13  |
| ALP [IU/l]                | 61.0 (51.5-57.7)                         | 64.0 (54.5-75.5)                      | 0.72  |
| Bilirubin [μmol/l]        | 6.02 (4.57-7.86)                         | 6.16 (4.70-8.20)                      | 0.98  |
| INR                       | 0.99 (0.95-1.06)                         | 0.93 (0.92-0.95)                      | 0.13  |
| Albumin [g/l]             | 38.0 (34.0-43.0)                         | 41.0 (37.2-42.0)                      | 0.50  |
| HOMA-IR                   | 2.31 (1.13-3.21)                         | 2.04 (1.76-2.71)                      | 1.00  |
| Saturation %              | 96 (90-98.75)                            | 97 (94.5-98)                          | 0.84  |

Abbreviations: ALT - alanine transaminase, AST - aspartate transaminase, BMI - body mass index, CRP - C-reactive protein, GGT - gamma-glutamyl-transferase, HCT - hematocrit, HDL - high-density lipoprotein, HGB - hemoglobin, INR - international normalized ratio, LDL - low-density lipoprotein, WBC - white blood cells, PLT - platelet count, RBC - red blood cells.

**Supplementary Table 3.** Comparison of biochemical parameters analyzed in the blood of COVID-19 patients [according to ALT activity](#).

| Parameters                   | ALT activity < 40 IU/L<br>(n = 36) | ALT activity ≥ 40 IU/L<br>(n = 34) | P                    |
|------------------------------|------------------------------------|------------------------------------|----------------------|
| FGF-21 [pg/ml]               | 277.7 (96.3-529.9)                 | 240.2 (103.3-507.0)                | 0.82                 |
| PTX3 pg/ml]                  | 2357.5 (1981.3-3080.4)             | 2254.0 (1723.8-3491.3)             | 0.63                 |
| Fetuin-A [μg/ml]             | 240.0 (202.9-270.6)                | 265.6 (205.6-321.9)                | 0.48                 |
| Irisin [ng/ml]               | 5.19 (3.94-5.85)                   | 5.61 (3.77-7.62)                   | 0.40                 |
| WBC [10 <sup>3</sup> /μl]    | 5.88 (4.74-6.34)                   | 5.76 (4.40-6.84)                   | 0.89                 |
| HGB [mg/dl]                  | 12.8 (12.3-13.8)                   | 12.6 (11.9-13.0)                   | 0.20                 |
| PLT [10 <sup>3</sup> /μl]    | 232.0 (189.2-307.7)                | 260.0 (202.7-342.2)                | 0.42                 |
| CRP [mg/l]                   | 4.79 (1.93-8.18)                   | 3.90 (2.06-25.2)                   | 0.77                 |
| IL-6 [pg/ml]                 | 3.35 (1.50-5.87)                   | 1.51 (1.50-7.45)                   | 0.69                 |
| Ferritin [μg/l]              | 176.0 (97.7-322.0)                 | 262.0 (133.2-595.5)                | 0.12                 |
| Iron [μmol/l]                | 16.5 (11.1-21.7)                   | 16.5 (11.2-22.3)                   | 0.99                 |
| AST [IU/l]                   | 18.0 (15.0-23.0)                   | 41.5 (20.0-51.0)                   | < 0.001              |
| GGT [IU/l]                   | 26.5 (15.0-49.0)                   | 59.0 (32.2-108.2)                  | 0.003                |
| Bilirubin [μmol/l]           | 5.88 (4.33-6.93)                   | 6.71 (5.02-8.48)                   | 0.03                 |
| ALP [IU/l]                   | 56.0 (50.0-69.0)                   | 66.0 (59.5-89.5)                   | 0.002                |
| INR                          | 0.99 (0.92-1.03)                   | 0.95 (0.92-0.97)                   | 0.24                 |
| Albumin [g/l]                | 40.0 (35.0-43.0)                   | 38.5 (34.0-42.0)                   | 0.41                 |
| HOMA-IR                      | 2.03 (1.48-2.54)                   | 2.67 (2.04-3.68)                   | 0.02                 |
| <a href="#">Saturation %</a> | <a href="#">97 (96-98)</a>         | <a href="#">97 (94.75-98)</a>      | <a href="#">0.17</a> |

Abbreviations: ALT - alanine transaminase, AST - aspartate transaminase, BMI - body mass index, CRP - C-reactive protein, GGT - gamma-glutamyl-transferase, HCT - hematocrit, HDL - high-density lipoprotein, HGB - hemoglobin, INR - international normalized ratio, LDL - low-density lipoprotein, WBC - white blood cells, PLT - platelet count, RBC - red blood cells.
